# Supplementary material
Source: MDPI journal article supplement (https://www.mdpi.com/2075-4701/6/7/154)
Supplement: s1 [file s1]

Supplementary Material: Cobalt-Nickel-Boron Supported over Polypyrrole-Derived Activated Carbon for Hydrolysis of Ammonia Borane

Yongjin Zou 1,2,*, Yubo Gao 1,2, Cuili Xiang 1,2, Hailiang Chu 1,2, Shujun Qiu 1,2, Erhu Yan 1,2,
Fen Xu 1,2, Chengying Tang 1,2 and Lixian Sun 1,2,*

**Figure S1.** TEM image of the Co-Ni-B catalyst.
